# Supplementary material for: Spatial Autocorrelation Approaches to Testing Residuals from Least Squares Regression
Source: PLoS One. 2016 Jan 22;11(1):e0146865. doi: 10.1371/journal.pone.0146865 (PMC4723244; doi:10.1371/journal.pone.0146865)
Supplement: S1 File — This file contains the original data used in this paper. (XLSX) [file pone.0146865.s001.xlsx]

## Sheet: Gross regional product(pc)
Region	2000	2005	2006	2007	2008	2009	2010	2011	2012	2013
Beijing	22459.7	45443.7	50467	58204	64491	66940	73856	81658	87475	93213
Tianjin	17993.2	35783.2	41163	46122	58656	62574	72994	85213	93173	99607
Hebei	7662.76	14782.3	16962	19877	22986	24581	28668	33969	36584	38716
Shanxi	5137.05	12495	14123	16945	21506	21522	26283	31357	33628	34813
Inner Mongolia	5871.79	16330.8	20053	25393	34869	39735	47347	57974	63886	67498
Liaoning	11226.4	18983.2	21788	25729	31739	35149	42355	50760	56649	61685.9
Jilin	6847.4	13348	15720	19383	23521	26595	31599	38460	43415	47191
Heilongjiang	8561.65	14434.1	16195	18478	21740	22447	27076	32819	35711	37509.3
Shanghai	34547	51474	57695	66367	66932	69164	76074	82560	85373	90092
Jiangsu	11773	24560	28814	33928	40014	44253	52840	62290	68347	74607
Zhejiang	13460.9	27702.7	31874	37411	41405	43842	51711	59249	63374	68462
Anhui	4867.41	8675.14	10055	12045	14448	16408	20888	25659	28792	31684
Fujian	11601.3	18645.8	21471	25908	29755	33437	40025	47377	52763	57856
Jiangxi	4851.26	9440	10798	12633	15900	17335	21253	26150	28800	31771
Shandong	9555.24	20096.5	23794	27807	32936	35894	41106	47335	51768	56322.6
Henan	5443.88	11346.5	13313	16012	19181	20597	24446	28661	31499	34174
Hubei	7188.28	11431	13296	16206	19858	22677	27906	34197	38572	42612.7
Hunan	5639.01	10426	11950	14492	18147	20428	24719	29880	33480	36763
Guangdong	12885.4	24435	28332	33151	37638	39436	44736	50807	54095	58540
Guangxi	4318.81	8787.73	10296	12555	14652	16045	20219	25326	27952	30588
Chongqing	5157.31	10982	12457	14660	20490	22920	27596	34500	38914	42795
Sichuan	4783.77	9060	10546	12893	15495	17339	21182	26133	29608	32454
Guizhou	2661.56	5051.96	5787	6915	9855	10971	13119	16413	19710	22921.7
Yunnan	4636.65	7835	8970	10540	12570	13539	15752	19265	22195	25083
Shaanxi	4549.22	9899	12138	14607	19700	21947	27133	33464	38564	42692
Gansu	3838.25	7476.53	8757	10346	12421	13269	16113	19595	21978	24296
Qinghai	5087.14	10044.7	11762	14257	18421	19454	24115	29522	33181	36510
Ningxia	4839.1	10239	11847	14649	19609	21777	26860	33043	36394	39420
Xinjiang	7469.81	13108	15000	16999	19797	19942	25034	30087	33796	37181

## Sheet: Level of urbanization (%)
Region	2000	2005	2006	2007	2008	2009	2010	2011	2012	2013
Beijing	77.54	83.62	84.33	84.5	84.9	85	85.9595	86.2	86.2	86.3
Tianjin	71.99	75.11	75.73	76.31	77.23	78.01	79.55	80.5	81.55	82.01
Hebei	26.08	37.6912	38.7652	40.2511	41.9016	43.7447	44.4954	45.6	46.8	48.12
Shanxi	34.91	42.1079	43.01	44.0298	45.1112	45.99	48.05	49.68	51.26	52.56
Inner Mongolia	42.68	47.2	48.64	50.15	51.71	53.4	55.5	56.62	57.74	58.71
Liaoning	54.2423	58.7	58.99	59.2	60.05	60.35	62.1029	64.05	65.65	66.45
Jilin	49.68	52.52	52.97	53.16	53.21	53.32	53.3499	53.4	53.7	54.2
Heilongjiang	51.54	53.1	53.5	53.8991	55.4	55.5	55.6608	56.5	56.9	57.4
Shanghai	88.31	89.09	88.7	88.7	88.6	88.6	89.3041	89.3	89.3	89.6
Jiangsu	41.49	50.5	51.9	53.2	54.3	55.6	60.58	61.9	63	64.11
Zhejiang	48.67	56.02	56.5	57.2	57.6	57.9	61.62	62.3	63.2	64
Anhui	27.81	35.5	37.1	38.7	40.5	42.1	43.01	44.8	46.5	47.86
Fujian	41.57	49.4	50.4	51.4	53	55.1	57.1	58.1	59.6	60.77
Jiangxi	27.67	37	38.68	39.8	41.36	43.18	44.06	45.7	47.51	48.87
Shandong	38	45	46.1	46.75	47.6	48.32	49.7	50.95	52.43	53.75
Henan	23.2	30.65	32.47	34.34	36.03	37.7	38.5	40.57	42.43	43.8
Hubei	40.22	43.2	43.8	44.3	45.2	46	49.7	51.83	53.5	54.51
Hunan	29.75	37	38.71	40.45	42.15	43.2	43.3	45.1	46.65	47.96
Guangdong	55	60.68	63	63.14	63.37	63.4	66.18	66.5	67.4	67.76
Guangxi	28.15	33.62	34.64	36.24	38.16	39.2	40	41.8	43.53	44.81
Chongqing	33.09	45.2	46.7	48.3	49.99	51.59	53.02	55.02	56.98	58.34
Sichuan	26.69	33	34.3	35.6	37.4	38.7	40.18	41.83	43.53	44.9
Guizhou	23.868	26.87	27.46	28.24	29.11	29.89	33.81	34.96	36.41	37.83
Yunnan	23.3629	29.5	30.5	31.6	33	34	34.7	36.8	39.31	40.48
Shaanxi	32.26	37.23	39.12	40.62	42.1	43.5	45.76	47.3	50.0207	51.3107
Gansu	24.01	30.02	31.09	32.25	33.56	34.89	36.12	37.15	38.75	40.13
Qinghai	34.76	39.25	39.26	40.07	40.86	41.9	44.72	46.22	47.44	48.51
Ningxia	32.43	42.28	43	44.02	44.98	46.1	47.9	49.82	50.67	52.01
Xinjiang	33.82	37.15	37.94	39.15	39.64	39.85	43.01	43.54	43.98	44.47

## Sheet: Railway distance (km)
Region		Beijing	Tianjin	Hebei	Shanxi	Inner Mongolia	Liaoning	Jilin	Heilongjiang	Shanghai	Jiangsu	Zhejiang	Anhui	Fujian	Jiangxi	Shandong	Henan	Hubei	Hunan	Guangdong	Guangxi	Chongqing	Sichuan	Guizhou	Yunnan	Shaanxi	Gansu	Qinghai	Ningxia	Xinjiang
	City	Beijing	Tianjin	Shijiazhuang	Taiyuan	Hohehot	Shenyang	Changchun	Harbin	Shanghai	Nanjing	Hangzhou	Hefei	Fuzhou	Nanchang	Jinan	Zhengzhou	Wuhan	Changsha	Guangzhou	Nanning	Chongqing	Chengdu	Guiyang	Kunming	Xian	Lanzhou	Xining	Yinchuan	Urumchi
Beijing	Beijing	0	137	277	508	667	741	1046	1288	1463	1160	1589	1074	2334	1449	497	689	1225	1587	2294	2566	2087	2042	2539	3178	1159	1811	2092	1343	3768
Tianjin	Tianjin	137	0	419	650	804	728	1033	1275	1326	1023	1452	973	2197	1444	360	831	1367	1729	2436	2708	2230	2185	2681	3320	1301	1948	2235	1480	3911
Hebei	Shijiazhuang	277	419	0	231	871	1126	1431	1673	1267	964	1393	914	1915	1293	301	412	948	1310	2017	2289	1810	1765	2262	2901	923	1599	1815	1547	3491
Shanxi	Taiyuan	508	650	231	0	640	1255	1560	1802	1498	1195	1624	1145	2521	1544	532	577	1179	1537	2243	2515	1997	1493	2460	2593	651	1327	1543	1316	3219
Inner Mongolia	Hohehot	667	804	871	640	0	1408	1713	1955	2130	1827	2256	1777	3303	2674	1164	1362	1898	2256	2962	3234	2637	2133	3100	3233	1291	1144	1360	676	3036
Liaoning	Shenyang	741	728	1126	1255	1408	0	305	547	2054	1751	2180	1701	2925	2151	1088	1538	1972	2334	3041	3313	2834	2789	3286	3925	1906	2552	2839	2084	4515
Jilin	Changchun	1046	1033	1431	1560	1713	305	0	242	2359	2056	2485	2006	3230	2456	1393	1843	2277	2639	3346	3618	3139	3094	3591	4230	2211	2857	3144	2389	4820
Heilongjiang	Harbin	1288	1275	1673	1802	1955	547	242	0	2601	2298	2727	2248	3472	2698	1635	2085	2519	2881	3588	3860	3381	3336	3833	4472	2453	3099	3386	2631	5062
Shanghai	Shanghai	1463	1326	1267	1498	2130	2054	2359	2601	0	303	201	615	1180	844	966	998	1235	1207	1810	2082	2516	2351	2053	2699	1509	2185	2401	2355	4077
Jiangsu	Nanjing	1160	1023	964	1195	1827	1751	2056	2298	303	0	429	312	1174	838	663	695	1231	1201	1804	2076	2093	2048	2054	2693	1206	1882	2098	2052	3774
Zhejiang	Hangzhou	1589	1452	1393	1624	2256	2180	2485	2727	201	429	0	451	979	643	1092	1124	1202	1006	1609	1881	2315	2552	1852	2498	1635	2311	2527	2481	4065
Anhui	Hefei	1074	973	914	1145	1777	1701	2006	2248	615	312	451	0	1196	478	613	645	1181	1226	1829	2210	2043	1998	2076	3098	1156	1832	2048	2002	3724
Fujian	Fuzhou	2334	2197	1915	2521	3303	2925	3230	3472	1180	1174	979	1196	0	622	1837	1649	1013	985	1588	1860	2301	2805	1838	2477	2389	3065	3281	3235	4957
Jiangxi	Nanchang	1449	1444	1293	1544	2674	2151	2456	2698	844	838	643	478	622	0	1137	927	391	419	1022	1294	1735	2239	1272	1911	1412	2088	2304	2258	4391
Shandong	Jinan	497	360	301	532	1164	1088	1393	1635	966	663	1092	613	1837	1137	0	666	1202	1564	2156	2428	2064	2019	2516	3119	1177	1853	2069	1840	3745
Henan	Zhengzhou	689	831	412	577	1362	1538	1843	2085	998	695	1124	645	1649	927	666	0	536	898	1605	1877	1398	1353	1850	2489	511	1187	1403	1357	3079
Hubei	Wuhan	1225	1367	948	1179	1898	1972	2277	2519	1235	1231	1202	1181	1013	391	1202	536	0	362	1069	1341	1233	1737	1314	1953	1047	1723	1939	1893	3615
Hunan	Changsha	1587	1729	1310	1537	2256	2334	2639	2881	1207	1201	1006	1226	985	419	1564	898	362	0	707	979	1419	1923	956	1595	1405	2081	2297	2251	3973
Guangdong	Guangzhou	2294	2436	2017	2243	2962	3041	3346	3588	1810	1804	1609	1829	1588	1022	2156	1605	1069	707	0	1314	2023	2527	1560	2199	2111	2787	3003	2957	4679
Guangxi	Nanning	2566	2708	2289	2515	3234	3313	3618	3860	2082	2076	1881	2210	1860	1294	2428	1877	1341	979	1314	0	1328	1832	865	1504	2383	3059	3275	3229	4951
Chongqing	Chongqing	2087	2230	1810	1997	2637	2834	3139	3381	2516	2093	2315	2043	2301	1735	2064	1398	1233	1419	2023	1328	0	504	463	1102	1346	1676	1892	1846	3530
Sichuan	Chengdu	2042	2185	1765	1493	2133	2789	3094	3336	2351	2048	2552	1998	2805	2239	2019	1353	1737	1923	2527	1832	504	0	967	1100	842	1172	1388	1342	3026
Guizhou	Guiyang	2539	2681	2262	2460	3100	3286	3591	3833	2053	2054	1852	2076	1838	1272	2516	1850	1314	956	1560	865	463	967	0	639	1809	2139	2355	2309	3993
Yunnan	Kunming	3178	3320	2901	2593	3233	3925	4230	4472	2699	2693	2498	3098	2477	1911	3119	2489	1953	1595	2199	1504	1102	1100	639	0	1942	2272	2488	2442	4126
Shaanxi	Xian	1159	1301	923	651	1291	1906	2211	2453	1509	1206	1635	1156	2389	1412	1177	511	1047	1405	2111	2383	1346	842	1809	1942	0	676	892	846	2568
Gansu	Lanzhou	1811	1948	1599	1327	1144	2552	2857	3099	2185	1882	2311	1832	3065	2088	1853	1187	1723	2081	2787	3059	1676	1172	2139	2272	676	0	216	468	1892
Qinghai	Xining	2092	2235	1815	1543	1360	2839	3144	3386	2401	2098	2527	2048	3281	2304	2069	1403	1939	2297	3003	3275	1892	1388	2355	2488	892	216	0	684	2108
Ningxia	Yinchuan	1343	1480	1547	1316	676	2084	2389	2631	2355	2052	2481	2002	3235	2258	1840	1357	1893	2251	2957	3229	1846	1342	2309	2442	846	468	684	0	2008
Xinjiang	Urumchi	3768	3911	3491	3219	3036	4515	4820	5062	4077	3774	4065	3724	4957	4391	3745	3079	3615	3973	4679	4951	3530	3026	3993	4126	2568	1892	2108	2008	0
